# Supplementary material for: Shh and Olig2 sequentially regulate oligodendrocyte differentiation from hiPSCs for the treatment of ischemic stroke
Source: PubMed Central journal article supplement (PMC9065175; doi:10.7150/thno.69217), 2022-03-28
Supplement: thnov12p3131s1.pdf [file thnov12p3131s1.pdf]

Supplementary materials for

**Shh and Olig2 sequentially regulate oligodendrocyte differentiation  
from hiPSCs for the treatment of ischemic stroke**

Jian Xu, Jingxin Zhao, Rui Wang, Yidi Zhang, Lan Shen, Qian Xiao, Yuan Xie,  
Jinjun Jiang, Yichu Nie, Wenbin Deng

The file includes:

- Supplementary Table S1. Detailed composition of culture medium.
- Supplementary Table S2. Primary antibodies used for immunostainings.
- Supplementary Table S3. Sequence of primers for qPCR analysis.
- Supplementary Table S4. Sequences of shRNA assays.
- Supplementary figures and figure legends

## Supplemental Tables

**Table S1. Detailed composition of culture medium**

| Media                | Components           | Provider             | Final con.        |
|----------------------|----------------------|----------------------|-------------------|
| <b>NIM1</b>          | DMEM/F12             | Life Technologies    | 50%               |
|                      | Neurobasal           | Gibco                | 50%               |
|                      | B27 Supplement (50X) | Stem cell technology | 1X                |
|                      | N2 Supplement (100X) | Stem cell technology | 1X                |
|                      | Recombinant hLIF     | PEPROTech            | 10 ng/ml          |
|                      | SB431542             | Med Chem Express     | 2 $\mu$ M         |
|                      | CHIR99021            | Med Chem Express     | 3 $\mu$ M         |
|                      | GlutaMAX             | Life Technologies    | 2 mM              |
|                      | Compound E           | Med Chem Express     | 0.1 $\mu$ M       |
|                      | Dorsomorphin         | Med Chem Express     | 2 $\mu$ M         |
| <b>NIM2</b>          | DMEM/F12             | Life Technologies    | 50%               |
|                      | Neurobasal           | Gibco                | 50%               |
|                      | B27 Supplement (50X) | Stem cell technology | 1X                |
|                      | N2 Supplement (100X) | Stem cell technology | 1X                |
|                      | Recombinant hLIF     | PEPROTech            | 10 ng/ml          |
|                      | SB431542             | Med Chem Express     | 2 $\mu$ M         |
|                      | CHIR99021            | Med Chem Express     | 3 $\mu$ M         |
|                      | GlutaMAX             | Life Technologies    | 2 mM              |
|                      | Compound E           | Med Chem Express     | 0.1 $\mu$ M       |
|                      | <b>NSMM</b>          | DMEM/F12             | Life Technologies |
| Neurobasal           |                      | Gibco                | 50%               |
| B27 Supplement (50X) |                      | Stem cell technology | 1X                |
| N2 Supplement (100X) |                      | Stem cell technology | 1X                |
| Recombinant hLIF     |                      | PEPROTech            | 10 ng/ml          |
| SB431542             |                      | Med Chem Express     | 2 $\mu$ M         |
| CHIR99021            |                      | Med Chem Express     | 3 $\mu$ M         |
| GlutaMAX             |                      | Life Technologies    | 2 mM              |

|            |                                        |                        |             |
|------------|----------------------------------------|------------------------|-------------|
| <b>GIM</b> | DMEM/F12                               | Gibco                  |             |
|            | B27 supplement lacking vitamin A (50X) | Stem cell technologies | 1X          |
|            | N2 Supplement (100X)                   | Stem cell technologies | 1X          |
|            | penicillin/streptomycin                | Gibco                  | 1%          |
|            | SAG                                    | Med Chem Express       | 1 $\mu$ M   |
|            | PDGF-AA                                | R&D Systems            | 10 ng/ml    |
|            | NT-3                                   | Millipore              | 10 ng/ml    |
|            | IGF-I                                  | R&D Systems            | 10 ng/ml    |
|            | AA                                     | Sigma-Aldrich          | 200 $\mu$ M |
|            | T3                                     | Sigma-Aldrich          | 60 ng/ml    |
| <b>DM</b>  | DMEM/F12                               | Gibco                  |             |
|            | B27 supplement lacking vitamin A (50X) | Stem cell technologies | 1X          |
|            | N2 Supplement (100X)                   | Stem cell technologies | 1X          |
|            | penicillin/streptomycin                | Gibco                  | 1%          |
|            | NT-3                                   | Millipore              | 10 ng/ml    |
|            | IGF-I                                  | R&D Systems            | 10 ng/ml    |
|            | AA                                     | Sigma-Aldrich          | 200 $\mu$ M |
|            | T3                                     | Sigma-Aldrich          | 60 ng/ml    |
| dbcAMP     | Sigma-Aldrich                          | 100 $\mu$ M            |             |

**Table S2. Primary antibodies used for immunostainings**

| Antigen                | Dilution |            | Reference                   |
|------------------------|----------|------------|-----------------------------|
| Olig2                  | 1/100    | Rabbit IgG | ab254043                    |
| NESTIN                 | 1/3200   | Mouse IgG  | CST#33475                   |
| SOX2                   | 1/400    | Mouse IgG  | CST#3579                    |
| O4                     | 1/500    | Mouse IgM  | R&D MAB1326                 |
| O4-APC                 | 1/50     | Mouse IgG  | Miltenyi Biotec 130-118-978 |
| NG2                    | 1/500    | Rabbit IgG | ab129051                    |
| NG2-PE                 | 1/200    | Rabbit IgG | C06035P                     |
| PDGFRa                 | 1/1000   | Rabbit IgG | CST#3174                    |
| PDGFRa-APC             | 1/50     | Mouse IgG1 | BioLegend #323512           |
| MBP                    | 1/50     | Rabbit IgG | CST#78896                   |
| GFAP                   | 1/400    | Mouse IgG  | G-3893                      |
| Islet1                 | 1/50     | Rabbit IgG | ab20607                     |
| beta III Tubulin(TUJ1) | 1/1000   | Rabbit IgG | ab18207                     |
| hNA(HuNu)              | 1/200    | Mouse IgG  | MAB1281                     |
| NeuN                   | 1/3200   | Rabbit IgG | CST#24307                   |
| A2B5                   | 1/500    | Mouse IgM  | Invitrogen#433110           |
| SOX10                  | 1/1000   | Rabbit IgG | ab264405                    |
| p-OLIG2 (S147)         | 1/500    | Rabbit IgG | Bioworld AP0734             |
| CEPT1                  | 1/500    | Rabbit IgG | 20496-1-AP                  |
| GAPDH                  | 1/5000   | Mouse IgG  | ab8245                      |
| $\beta$ -actin         | 1/2000   | Rabbit IgG | ab8227                      |

**Table S3. Sequence of primers for qPCR analysis.**

| Gene name      | Species | Sequence of primers |                          |
|----------------|---------|---------------------|--------------------------|
| <i>β-actin</i> | Human   | Forward             | CCAGAGCCCGATGACCTTTTT    |
|                |         | Reserve             | CACTGCCTCCTAGCTTGTCC     |
| <i>Olig2</i>   | Human   | Forward             | GCCTCGTATGTGAGGCAAAA     |
|                |         | Reserve             | TCATCAAGAAATGTCGCACG     |
| <i>CSPG4</i>   | Human   | Forward             | CTTTGACCCTGACTATGTTGGC   |
|                |         | Reserve             | TGCAGGCGTCCAGAGTAGA      |
| <i>PDGFRa</i>  | Human   | Forward             | TGGCAGTACCCCA TGCTGAA    |
|                |         | Reserve             | CCAAGACCGTCACAAAAAGGC    |
| <i>ST8SIA1</i> | Human   | Forward             | GTCCTCTGTTGGCTCTACATCT   |
|                |         | Reserve             | CCCCGTACATCCACATGCTC     |
| <i>SOX10</i>   | Human   | Forward             | CCTCACAGATCGCCTACACC     |
|                |         | Reserve             | CATATAGGAGAAGGCCGAGTAGA  |
| <i>NKX2.2</i>  | Human   | Forward             | GAGGACGACGACGAATACAAC    |
|                |         | Reserve             | GTTCGAGGGTTTGTGCTTCTT    |
| <i>PAX6</i>    | Human   | Forward             | TGGGCAGGTATTACGAGACTG    |
|                |         | Reserve             | ACTCCCGCTTATACTGGGCTA    |
| <i>NESTIN</i>  | Human   | Forward             | CTGCTACCCTTGAGACACCTG    |
|                |         | Reserve             | GGGCTCTGATCTCTGCATCTAC   |
| <i>NANOG</i>   | Human   | Forward             | TTTGTGGCCTGAAGAAAAC      |
|                |         | Reserve             | CCATCGGAGTTGCTCTCCA      |
| <i>POU5F1</i>  | Human   | Forward             | CTGGGTTGATCCTCGGACCT     |
|                |         | Reserve             | CCATCGGAGTTGCTCTCCA      |
| <i>PLP1</i>    | Human   | Forward             | ACCTATGCCCTGACCGTTG      |
|                |         | Reserve             | TGCTGGGGAAGGCAATAGACT    |
| <i>NGN2</i>    | Human   | Forward             | AGGAAGAGGACGTGTTAGTGC    |
|                |         | Reserve             | GCAATCGTGTACCAGACCCAG    |
| <i>SOX9</i>    | Human   | Forward             | AGCGAACGCACATCAAGAC      |
|                |         | Reserve             | CTGTAGGCGATCTGTTGGGG     |
| <i>HB9</i>     | Human   | Forward             | CTCCTACTCGTACCCGACG      |
|                |         | Reserve             | TTGAAGTCGGGCACTTAGGC     |
| <i>SMARCA4</i> | Human   | Forward             | GACCAGCACTCCCAAGGTAC     |
|                |         | Reserve             | CTGGCCCGGAAGACATCTG      |
| <i>CEPT1</i>   | Human   | Forward             | ATGTGGAGATTCTCACCCGGA    |
|                |         | Reserve             | TCTTCTAGCCGCTTTAGTTGGT   |
| <i>CHPT1</i>   | Human   | Forward             | CACCGAAGAGGCACCATACTG    |
|                |         | Reserve             | CCCTAAAGGGGAACAAGAGTTTG  |
| <i>PPARG</i>   | Human   | Forward             | GGGATCAGCTCCGTGGATCT     |
|                |         | Reserve             | TGCACTTTGGTACTCTTGAAGTT  |
| <i>PPARD</i>   | Human   | Forward             | CAGGGCTGACTGCAAACGA      |
|                |         | Reserve             | CTGCCACAATGTCTCGATGTC    |
| <i>PPARA</i>   | Human   | Forward             | ATGGTGGACACGAAAAGCC      |
|                |         | Reserve             | CGATGGATTGCGAAA TCTCTTGG |
| <i>MBP</i>     | Human   | Forward             | GGCCGGACCAAGATGAAAA      |
|                |         | Reserve             | CCCCAGCTAAATCTGCTCAGG    |
| <i>MOG</i>     | Human   | Forward             | GGCAGCAATGGAATTGAAAGTAG  |
|                |         | Reserve             | TGGGGTCCTAGAACACCAAAG    |
| <i>MAG</i>     | Human   | Forward             | GGTGTCTGGTACTTCAATAGCC   |
|                |         | Reserve             | CTCTCGTGGACTACTTGGGTG    |
| <i>BDNF</i>    | Rat     | Forward             | GCTGCTGGATGAGGACCAGA     |
|                |         | Reserve             | GCTGCTGGATGAGGACCAGA     |
| <i>β-actin</i> | Rat     | Forward             | GCCTTCCTCTTGGGTAT        |
|                |         | Reserve             | GGCATAGAGGTCTTTACGG      |

**Table S4. Sequences of shRNA assays.**

| RNAi Name      | Species Specificity | Target sequences               |
|----------------|---------------------|--------------------------------|
| CEPT1 shRNA1   | Human               | 5`- ACTGTAGCAGGGACCATATTT-3`   |
| CEPT1 shRNA2   | Human               | 5`- GGCACCTCTGTGGGCATATAT-3`   |
| CEPT1 shRNA3   | Human               | 5`- TGGTAACACGCCCTAACTATC-3`   |
| Scramble shRNA | Huamn               | 5' -GATCTCGCTTGGGCGAGAGTAA -3' |

## Supplementary Figures

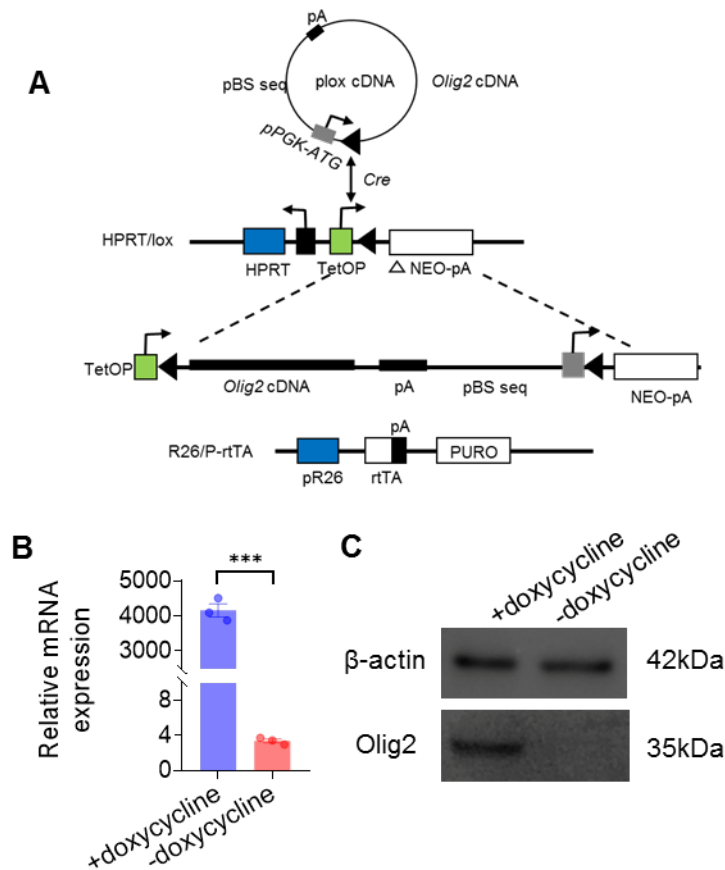

**Figure S1** Establishment of hiPSC cell lines with induced expression of Olig2. **A** Schematic diagram of Tet-inducible Olig2 expression in hiPSCs. **B** qPCR analysis of Olig2 mRNA expression levels with treated or untreated doxycycline after 24 h (1  $\mu\text{g}/\text{mL}$ ) ( $n = 3$ , \*\*\*  $p < 0.001$ , by a two-tailed Student's  $t$  test). **C** Western blot for Olig2 expression with treated or untreated doxycycline after 24 h. mRNA and protein levels were normalized to the housekeeping gene  $\beta$ -actin. Graphs represent the individual data points and the mean  $\pm$  SEM of three independent experiments.

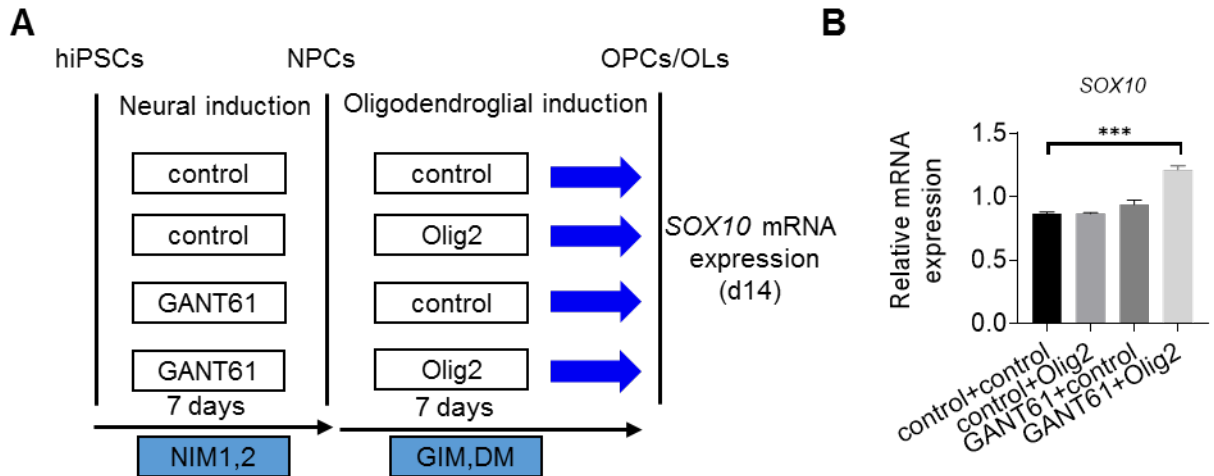

**Figure S2 A** Diagram of hiPSCs differentiated into NPCs and OPCs/OLs with untreated or treated GANT61, followed by induction of Olig2 expression. **B** qPCR analysis of *SOX10* mRNA expression at day 14 of differentiation (n = 3, \*\*\* p < 0.001). Graphs represent the individual data points and the mean  $\pm$  SEM of three independent experiments.



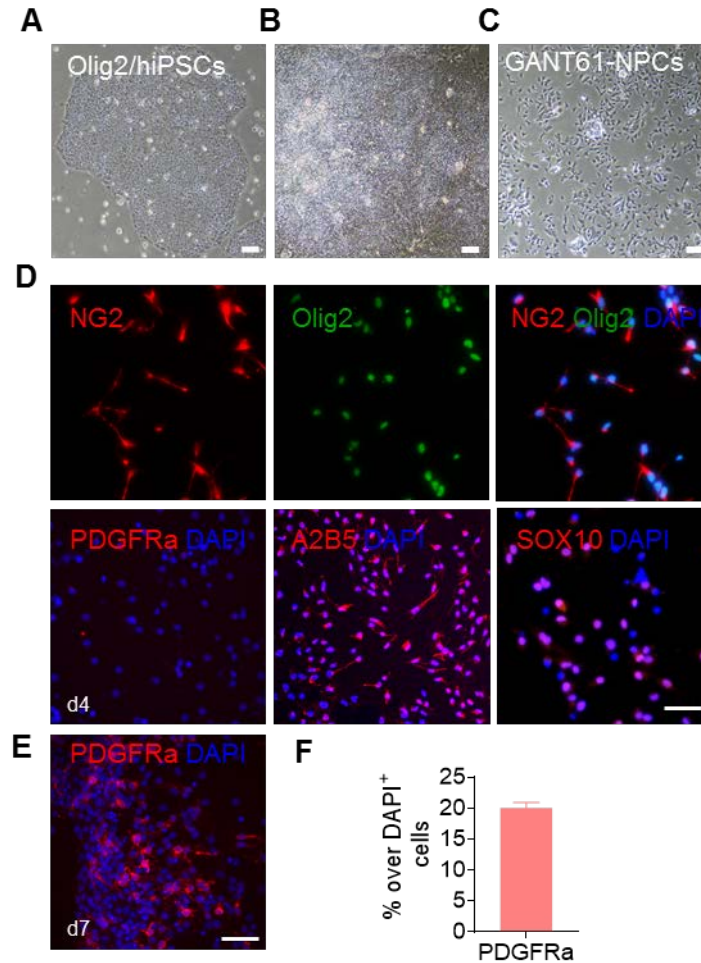

**Figure S3** Adherent hiPSC (A) colonies treated with NIM1 for 2 days, followed by NIM2 for another 5 days, generated neural tube-like structures (B). The cultured cells were dissociated as single cells in six-well plates precoated with Matrigel. Confluent GANT61-NPCs (passage 2) were cultivated in adherent monoculture and maintained typical neural crest morphology during *in vitro* culture (C). D Representative immunofluorescent staining images of Olig2, NG2, SOX10, PDGFRa, and A2B5 in Olig2 cultures at d4 after Olig2 induction (scale bar, 50  $\mu$ m). E Representative immunofluorescent staining images of PDGFRa in Olig2 cultures at d7 (scale bar, 100  $\mu$ m).

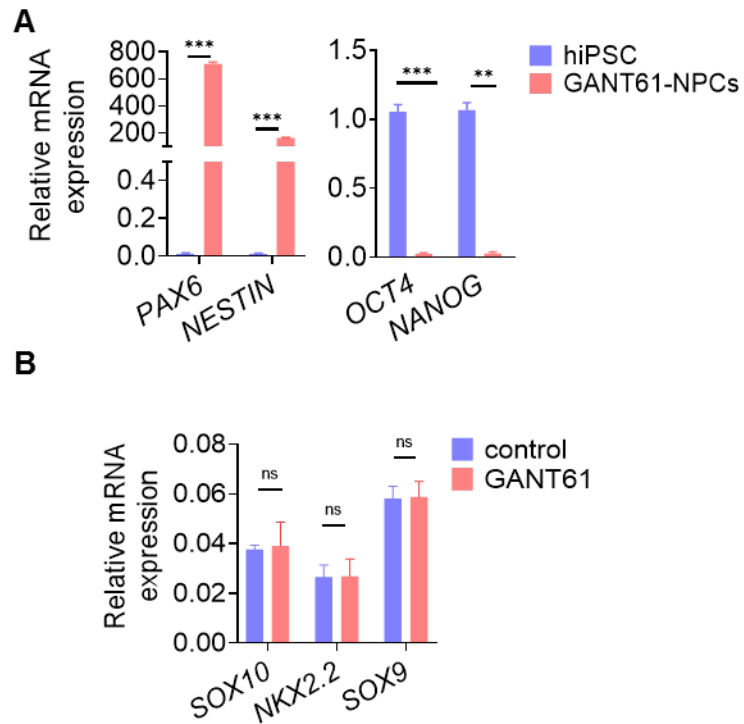

**Figure S4** **A** The relative mRNA expression of GANT61-NPCs makers (*PAX6*, *NESTIN*) and pluripotency genes (*OCT4*, *NANOG*) in undifferentiated hiPSCs were detected by qPCR (n = 3, \*\* p < 0.01, \*\*\* p < 0.001, by a two-tailed Student's t test). **B** qPCR analysis for the OL-specific lineage maker genes *SOX10*, *NKX2.2* and *SOX9* mRNA expression level (ns, not significant, p > 0.05).

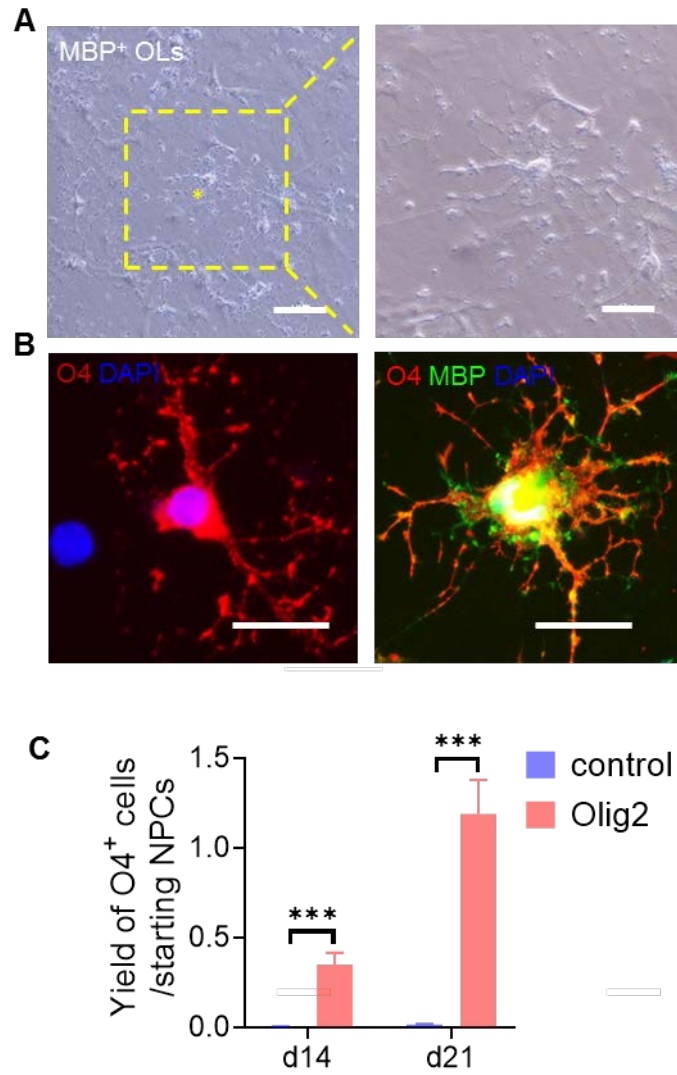

**Figure S5** **A** Representative images for Olig2-induced OLs (scale bar, left, 100 $\mu$ m; right, 50  $\mu$ m). **B** by d21, the Olig2-induced OLs coexpressed O4-epitope, the more mature OL marker, MBP (scale bars, 50  $\mu$ m). **C** Quantification of O4<sup>+</sup> mature OL yields at d14 and d28 after Olig2 transduction (n = 3, \*\*\* p < 0.001).

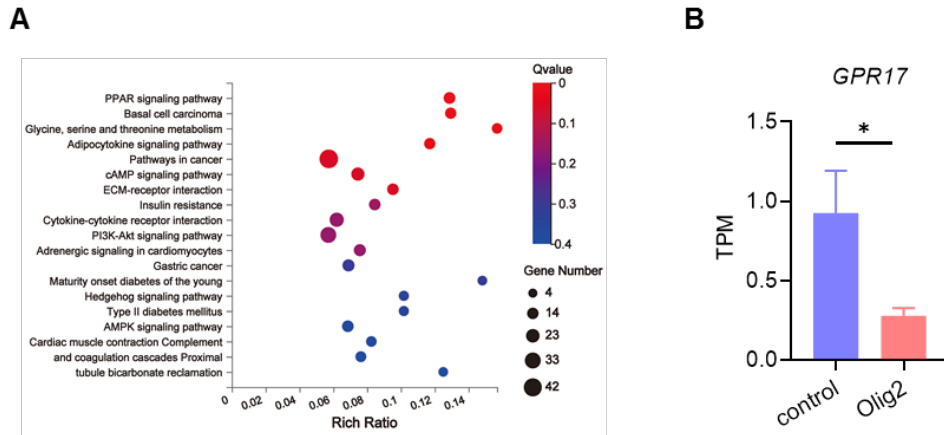

**Figure S6. A** KEGG pathway enrichment analysis of the Olig2/control-OPC-related mRNA-based RNA-seq data. The PPAR signaling pathway was highly enriched in Olig2-OPCs, and  $p < 0.05$  was used as the threshold to select KEGG terms. **B** RNA-seq data indicated that the *GPR17* mRNA expression level was significantly downregulated in Olig2 OPCs ( $n = 6$ , \*  $p < 0.05$ , by a two-tailed Student's *t* test).

**A**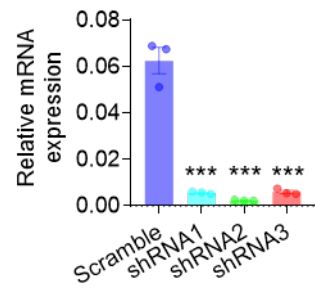**B**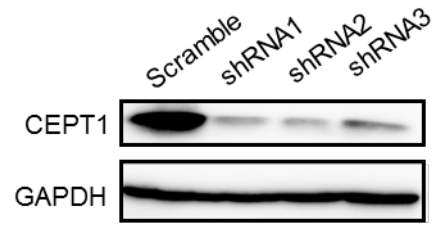

**Figure S7 A** qPCR analysis of *CEPT1* knockdown efficiency (n = 3, \*\*\* p < 0.001, by a two-tailed Student's *t* test). **B** Western blot analysis of *CEPT1* knockdown efficiency. Proteins were normalized to GAPDH.

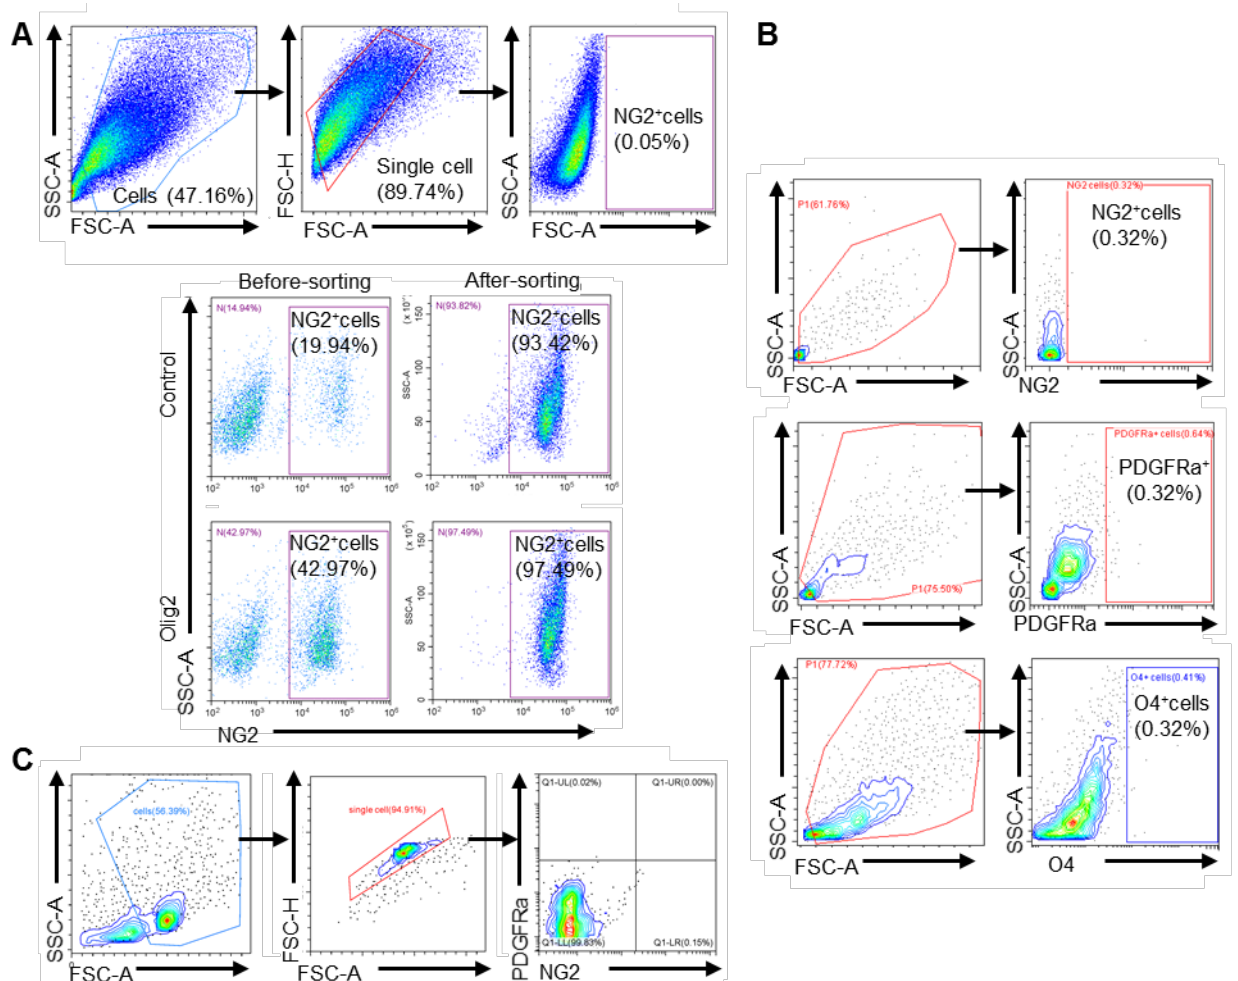

**Figure S8** **A** Gating strategies to purify NG2<sup>+</sup> OPCs for RNA-seq and cell transplantation. **B** Gating strategies to analyze the expression of the OPC-specific surface protein markers NG2, PDGFRa, and O4 in control-OPCs and Olig2-OPCs. **C** Gating strategies to analyze the coexpression of OPC-specific surface markers NG2 or PDGFRa in control-OPCs and Olig2-OPCs.

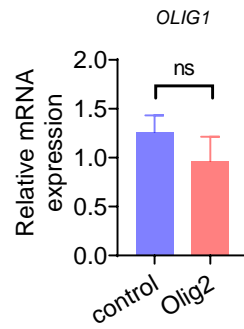

**Figure S9** qPCR analysis for the mRNA expression level of *OLIG1* at 1 weeks after Olig2 induction. Olig2 overexpression did not affect the mRNA expression of *OLIG1* (n = 3, ns p > 0.05, by a two-tailed Student's t test).
